# Supplementary material for: ZIPCO, a putative metal ion transporter, is crucial for Plasmodium liver-stage development
Source: PubMed Central journal article supplement (PMC4237467; doi:10.15252/emmm.201403868), 2014-09-25
Supplement: emmm0006-1387-sd3.pdf [file emmm0006-1387-sd3.pdf]

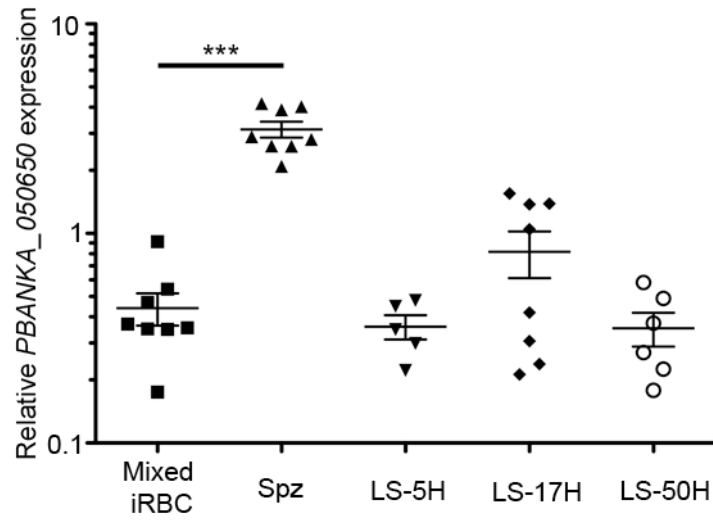

**Figure S1. Expression of *PBANKA\_050650* mRNA during the life cycle**
